# Supplementary material for: Coronary Calcium Score Predicts Cardiovascular Mortality in Diabetes: Diabetes Heart Study
Source: PubMed Central journal article supplement — Diabetes Care. 2013 Mar 14;36(4):972–7. doi: 10.2337/dc12-1548 (PMC3609509; doi:10.2337/dc12-1548), 2013-03-14
Supplement: supp_dc12-1548v121548_DC121548SupplementaryData.pdf [file supp_dc12-1548v121548_DC121548SupplementaryData.pdf]

SUPPLEMENTARY DATA

**Supplementary Table 1.** Odds Ratio for Cardiovascular Mortality with Higher CAC Scores in the Diabetes Heart Study Cohort Compared to CAC Score < 10 in a Full Model

| Variable                    | Odds Ratio | 95% Confidence Interval | Chi-Square | p-value |
|-----------------------------|------------|-------------------------|------------|---------|
| *CAC 10-99                  | 2.90       | 0.73-19.36              | 2          | 0.14    |
| *CAC 100-299                | 2.87       | 0.63-20.21              | 2          | 0.18    |
| *CAC 300-999                | 4.06       | 1.05-26.79              | 4          | 0.04    |
| *CAC 1000+                  | 9.86       | 2.83-62.43              | 17         | 0.0001  |
| †Log <sub>2</sub> [CAC + 1] | 1.24       | 1.14-1.36               | 26         | 0.0001  |
| ‡Ordinal Coronary Calcium   | 1.71       | 1.39-2.15               | 28         | 0.0001  |

CAC; Coronary Artery Calcium Score. Subjects were separated into five groups based on CAC score derived from baseline CT scans, CAC (0-9, 10-99, 100-299, 300-999, and  $\geq 1000$ ). \*Adjusted for age, gender, race, smoking, total and HDL-Cholesterol, systolic blood pressure, anti-hypertensive medications, HbA1C, and duration of diabetes. †Adjusted risk of CVD mortality associated with a doubling of the coronary calcium score (a 1-unit increase in log<sub>2</sub> [CAC + 1]). ‡Adjusted risk of CVD mortality with every higher CAC category.

SUPPLEMENTARY DATA

**Supplementary Figure 1.** Univariate P trend for Cardiovascular Mortality with Increasing CAC Scores over 7.4 years: Diabetes Heart Study

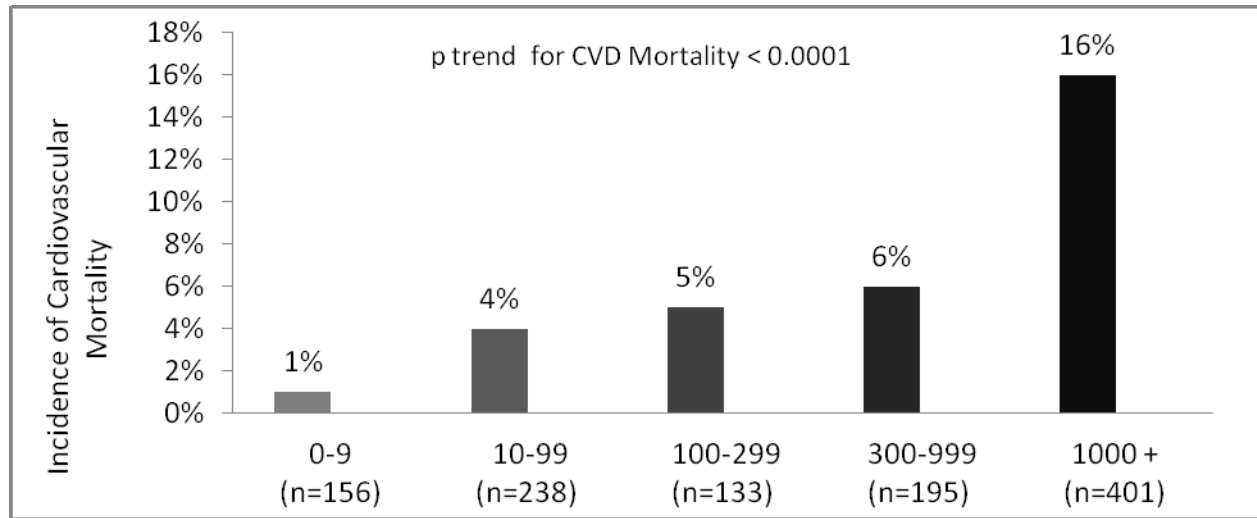

CAC, Coronary Artery Calcium Score. Subjects were separated into five groups based on CAC score derived from baseline CT scans, CAC (0-9, 10-99, 100-299, 300-999, and  $\geq 1000$ ).
